# Supplementary material for: Efficacy of pre-participation cardiac evaluation recommendations among athletes participating in World Athletics Championships
Source: Oxford University Press journal article supplement (doi:10.1177/2047487319884385), 2019-10-24
Supplement: cpr884385_supplemental_material.pdf [file cpr884385_supplemental_material.pdf]

## Supplement

Table 4. Number of athletes (percentage of respondents) reporting examinations displayed by development level of home country (LMIC=Low or moderate level of Human development index (HDI), HIC=High level of HDI, VHIC=Very high level of HDI), insurance type (Fed=Federation health insurance, Other=other type of insurance), event type (Power/strength, Endurance) and gender (female, male). Examinations were clinical heart examination (CHE), 12-lead rest electrocardiogram (1-lead rest ECG), stress electrocardiogram (stress ECG), echocardiography examination and at least one Pre-Participation Cardiac Examination (PPCE).

|                   |        | Development level of home country |        |         |         |        |         |         |         |          |               |         |          |
|-------------------|--------|-----------------------------------|--------|---------|---------|--------|---------|---------|---------|----------|---------------|---------|----------|
|                   |        | LMIC                              |        |         | HIC     |        |         | VHIC    |         |          | All countries |         |          |
|                   |        | Fed                               | Other  | All     | Fed     | Other  | All     | Fed     | Other   | All      | Fed           | Other   | All      |
| <b>CHE</b>        |        |                                   |        |         |         |        |         |         |         |          |               |         |          |
| Power/strength    | Female | 0 (0)                             | -      | 0 (0)   | 13 (59) | 2 (50) | 15 (58) | 19 (51) | 6 (46)  | 25 (50)  | 32 (48)       | 8 (47)  | 40 (48)  |
|                   | Male   | 2 (29)                            | 0 (0)  | 2 (18)  | 1 (6)   | 2 (17) | 3 (10)  | 15 (54) | 11 (65) | 26 (58)  | 18 (35)       | 13 (39) | 31 (36)  |
|                   | Tot    | 2 (14)                            | 0 (0)  | 2 (11)  | 14 (36) | 4 (25) | 18 (33) | 34 (52) | 17 (57) | 51 (54)  | 50 (42)       | 21 (42) | 71 (42)  |
| Endurance         | Female | 4 (22)                            | 4 (67) | 8 (33)  | 2 (29)  | 1 (50) | 3 (33)  | 18 (45) | 10 (91) | 28 (55)  | 24 (37)       | 15 (79) | 39 (46)  |
|                   | Male   | 1 (6)                             | 4 (44) | 5 (20)  | 3 (60)  | 2 (29) | 5 (42)  | 21 (60) | 6 (67)  | 27 (61)  | 25 (45)       | 12 (48) | 37 (46)  |
|                   | Tot    | 5 (15)                            | 8 (53) | 13 (27) | 5 (42)  | 3 (33) | 8 (38)  | 39 (52) | 16 (80) | 55 (58)  | 49 (40)       | 27 (61) | 76 (46)  |
| All events        | Female | 4 (16)                            | 4 (67) | 8 (26)  | 15 (52) | 3 (50) | 18 (51) | 37 (48) | 16 (67) | 53 (52)  | 56 (43)       | 23 (64) | 79 (47)  |
|                   | Male   | 3 (13)                            | 4 (31) | 7 (19)  | 4 (18)  | 4 (21) | 8 (20)  | 36 (57) | 17 (65) | 53 (60)  | 43 (40)       | 25 (43) | 68 (41)  |
|                   | Tot    | 7 (15)                            | 8 (42) | 15 (22) | 19 (37) | 7 (28) | 26 (34) | 73 (52) | 33 (66) | 106 (56) | 99 (41)       | 48 (51) | 147 (44) |
| <b>Stress ECG</b> |        |                                   |        |         |         |        |         |         |         |          |               |         |          |

|                         |        |        |        |         |         |        |         |         |         |          |          |         |          |
|-------------------------|--------|--------|--------|---------|---------|--------|---------|---------|---------|----------|----------|---------|----------|
| Power/strength          | Female | 0 (0)  | -      | 0 (0)   | 6 (29)  | 1 (33) | 7 (29)  | 7 (19)  | 4 (31)  | 11 (22)  | 13 (20)  | 5 (31)  | 18 (22)  |
|                         | Male   | 2 (29) | 0 (0)  | 2 (18)  | 1 (6)   | 2 (17) | 3 (10)  | 11 (39) | 5 (29)  | 16 (36)  | 14 (27)  | 7 (21)  | 21 (25)  |
|                         | Tot    | 2 (13) | 0 (0)  | 2 (11)  | 7 (18)  | 3 (20) | 10 (19) | 18 (28) | 9 (30)  | 27 (28)  | 27 (23)  | 12 (24) | 39 (23)  |
| Endurance               | Female | 1 (6)  | 0 (0)  | 1 (4)   | 4 (57)  | 1 (50) | 5 (56)  | 12 (29) | 6 (55)  | 18 (35)  | 17 (26)  | 7 (37)  | 24 (28)  |
|                         | Male   | 2 (12) | 0 (0)  | 2 (8)   | 2 (33)  | 2 (29) | 4 (31)  | 14 (40) | 1 (11)  | 15 (34)  | 18 (32)  | 3 (12)  | 21 (26)  |
|                         | Tot    | 3 (9)  | 0 (0)  | 3 (6)   | 6 (46)  | 3 (33) | 9 (41)  | 26 (34) | 7 (35)  | 33 (34)  | 35 (28)  | 10 (23) | 45 (27)  |
| All events              | Female | 1 (4)  | 0 (0)  | 1 (3)   | 10 (36) | 2 (40) | 12 (36) | 19 (24) | 10 (42) | 29 (28)  | 30 (23)  | 12 (34) | 42 (25)  |
|                         | Male   | 4 (17) | 0 (0)  | 4 (11)  | 3 (13)  | 4 (21) | 7 (17)  | 25 (40) | 6 (23)  | 31 (35)  | 32 (29)  | 10 (18) | 42 (25)  |
|                         | Tot    | 5 (10) | 0 (0)  | 5 (7)   | 13 (25) | 6 (25) | 19 (25) | 44 (31) | 16 (32) | 60 (31)  | 62 (26)  | 22 (24) | 84 (25)  |
| <b>12-lead rest ECG</b> |        |        |        |         |         |        |         |         |         |          |          |         |          |
| Power/strength          | Female | 1 (12) | -      | 1 (12)  | 9 (41)  | 1 (25) | 10 (38) | 26 (70) | 8 (62)  | 34 (68)  | 36 (54)  | 9 (53)  | 45 (54)  |
|                         | Male   | 2 (29) | 0 (0)  | 2 (18)  | 2 (12)  | 3 (25) | 5 (18)  | 21 (75) | 13 (76) | 34 (76)  | 25 (49)  | 16 (48) | 41 (49)  |
|                         | Tot    | 3 (20) | 0 (0)  | 3 (16)  | 11 (29) | 4 (25) | 15 (28) | 47 (72) | 21 (70) | 68 (72)  | 61 (52)  | 25 (50) | 86 (51)  |
| Endurance               | Female | 1 (6)  | 2 (40) | 3 (13)  | 5 (71)  | 1 (50) | 6 (67)  | 23 (56) | 9 (82)  | 32 (62)  | 29 (44)  | 12 (67) | 41 (49)  |
|                         | Male   | 2 (12) | 5 (56) | 7 (28)  | 2 (33)  | 2 (29) | 4 (31)  | 27 (77) | 6 (67)  | 33 (75)  | 31 (54)  | 13 (52) | 44 (54)  |
|                         | Tot    | 3 (9)  | 7 (50) | 10 (21) | 7 (54)  | 3 (33) | 10 (45) | 50 (66) | 15 (75) | 65 (68)  | 60 (49)  | 25 (58) | 85 (51)  |
| All events              | Female | 2 (8)  | 2 (40) | 4 (13)  | 14 (48) | 2 (33) | 16 (46) | 49 (63) | 17 (71) | 66 (65)  | 65 (49)  | 21 (60) | 86 (51)  |
|                         | Male   | 4 (17) | 5 (38) | 9 (25)  | 4 (18)  | 5 (26) | 9 (22)  | 48 (76) | 19 (73) | 67 (75)  | 56 (52)  | 29 (50) | 85 (51)  |
|                         | Tot    | 6 (12) | 7 (39) | 13 (19) | 18 (35) | 7 (28) | 25 (33) | 97 (69) | 36 (72) | 133 (70) | 121 (50) | 50 (54) | 171 (51) |
| <b>Echocardiography</b> |        |        |        |         |         |        |         |         |         |          |          |         |          |
| Power/strength          | Female | 0 (0)  | 0 (0)  | 0 (0)   | 4 (18)  | 1 (25) | 5 (19)  | 12 (32) | 4 (33)  | 16 (33)  | 16 (24)  | 5 (29)  | 21 (25)  |
|                         | Male   | 1 (14) | 0 (0)  | 1 (9)   | 1 (6)   | 3 (27) | 4 (14)  | 5 (18)  | 9 (53)  | 14 (31)  | 7 (13)   | 12 (38) | 19 (23)  |

|                 |        |         |        |         |         |         |         |          |         |          |          |         |          |
|-----------------|--------|---------|--------|---------|---------|---------|---------|----------|---------|----------|----------|---------|----------|
|                 | Tot    | 1 (7)   | 0 (0)  | 1 (5)   | 5 (13)  | 4 (27)  | 9 (17)  | 17 (26)  | 13 (45) | 30 (32)  | 23 (19)  | 17 (35) | 40 (24)  |
| Endurance       | Female | 0 (0)   | 1 (17) | 1 (4)   | 2 (29)  | 0 (0)   | 2 (22)  | 14 (34)  | 7 (64)  | 21 (40)  | 16 (25)  | 8 (42)  | 24 (29)  |
|                 | Male   | 2 (12)  | 0 (0)  | 2 (8)   | 3 (50)  | 1 (14)  | 4 (31)  | 15 (43)  | 2 (22)  | 17 (39)  | 20 (35)  | 3 (12)  | 23 (28)  |
|                 | Tot    | 2 (6)   | 1 (7)  | 3 (6)   | 5 (38)  | 1 (11)  | 6 (27)  | 29 (38)  | 9 (45)  | 38 (40)  | 36 (30)  | 11 (26) | 47 (28)  |
| All events      | Female | 0 (0)   | 1 (14) | 1 (3)   | 6 (21)  | 1 (17)  | 7 (20)  | 26 (33)  | 11 (48) | 37 (37)  | 32 (24)  | 13 (36) | 45 (27)  |
|                 | Male   | 3 (13)  | 0 (0)  | 3 (9)   | 4 (17)  | 4 (22)  | 8 (20)  | 20 (32)  | 11 (42) | 31 (35)  | 27 (25)  | 15 (27) | 42 (25)  |
|                 | Tot    | 3 (6)   | 1 (5)  | 4 (6)   | 10 (19) | 5 (21)  | 15 (20) | 46 (33)  | 22 (45) | 68 (36)  | 59 (24)  | 28 (30) | 87 (26)  |
| <b>Any PPCE</b> |        |         |        |         |         |         |         |          |         |          |          |         |          |
| Power/strength  | Female | 1 (14)  | -      | 1 (14)  | 14 (64) | 2 (50)  | 16 (62) | 27 (73)  | 8 (67)  | 35 (71)  | 42 (64)  | 10 (62) | 52 (63)  |
|                 | Male   | 3 (43)  | 0 (0)  | 3 (27)  | 2 (12)  | 5 (45)  | 7 (26)  | 22 (79)  | 15 (88) | 37 (82)  | 27 (53)  | 20 (62) | 47 (57)  |
|                 | Tot    | 4 (29)  | 0 (0)  | 4 (22)  | 16 (42) | 7 (47)  | 23 (43) | 49 (75)  | 23 (79) | 72 (77)  | 69 (59)  | 30 (62) | 99 (60)  |
| Endurance       | Female | 4 (22)  | 4 (67) | 8 (33)  | 6 (86)  | 1 (50)  | 7 (78)  | 24 (59)  | 10 (91) | 34 (65)  | 34 (52)  | 15 (79) | 49 (58)  |
|                 | Male   | 2 (12)  | 5 (56) | 7 (28)  | 3 (60)  | 2 (29)  | 5 (42)  | 28 (80)  | 6 (67)  | 34 (77)  | 33 (59)  | 13 (52) | 46 (57)  |
|                 | Tot    | 6 (18)  | 9 (60) | 15 (31) | 9 (75)  | 3 (33)  | 12 (57) | 52 (68)  | 16 (80) | 68 (71)  | 67 (55)  | 28 (64) | 95 (57)  |
| All events      | Female | 5 (20)  | 4 (67) | 9 (29)  | 20 (69) | 3 (50)  | 23 (66) | 51 (65)  | 18 (78) | 69 (68)  | 76 (58)  | 25 (71) | 101 (60) |
|                 | Male   | 5 (22)  | 5 (38) | 10 (28) | 5 (24)  | 7 (39)  | 12 (31) | 50 (79)  | 21 (81) | 71 (80)  | 60 (56)  | 33 (58) | 93 (57)  |
|                 | Tot    | 10 (21) | 9 (47) | 19 (28) | 25 (50) | 10 (42) | 35 (47) | 101 (72) | 39 (80) | 140 (74) | 136 (57) | 58 (63) | 194 (59) |
